# Supplementary material for: Environmental Heterogeneity Drives Within-Host Diversification and Evolution of Pseudomonas aeruginosa
Source: PubMed Central journal article supplement — mBio. 2014 Sep 16;5(5):e01592-14. doi: 10.1128/mBio.01592-14 (PMC4172072; doi:10.1128/mbio.01592-14), 2014-09-16
Supplement: mbo005141988st1.pdf [file mbo005141988st1.pdf]

**Table S1:** SNP changes observed in the P30M0 lineage.

| Branch <sup>a</sup> | Position | Type of mutation | Gene name     | Product                                         | PseudoCAP Function Class                       |
|---------------------|----------|------------------|---------------|-------------------------------------------------|------------------------------------------------|
| listA               | T163P    | Missense         | PA0652 vfr    | transcriptional regulator Vfr                   | Transcriptional regulators                     |
| listA               | L7L      | Silent           | PA4695 ilvH   |                                                 |                                                |
| listA               | R12L     | Missense         | PA1430 lasR   | transcriptional regulator LasR                  |                                                |
| listA               | G476S    | Missense         | PA0928 gacS   | sensor/response regulator hybrid                | Two-component regulatory systems               |
| listA               | A19P     | Missense         | PA2020        | probable transcriptional regulator              | Transcriptional regulators                     |
| listB               | G505A    | Missense         | PA3545 algG   | alginate-c5-mannuronan-epimerase AlgG           |                                                |
| listB               | G10G     | Silent           | PA4755 greA   | transcription elongation factor GreA            | Transcription, RNA processing and degradation  |
| listC               | P515P    | Silent           | PA14_03220    | Hypothetical protein                            | Hypothetical, unclassified, unknown            |
| listC               | S480S    | Silent           | PA0262        | conserved hypothetical protein                  | Hypothetical, unclassified, unknown            |
| listC               |          | 31 Not annotated |               |                                                 |                                                |
| listC               | A28P     | Missense         | PA3897        | hypothetical protein                            | Membrane proteins                              |
| listC               | Y59C     | Missense         | PA0762 algU   | sigma factor AlgU                               | Transcriptional regulators                     |
| listC               | R527H    | Missense         | PA3257 prc    | periplasmic tail-specific protease              |                                                |
| listC               | T57T     | Silent           | PA3399        | hypothetical protein                            | Hypothetical, unclassified, unknown            |
| listD               | G73G     | Silent           | PA4286        | hypothetical protein                            | Hypothetical, unclassified, unknown            |
| listD               | A380A    | Silent           | PA1238        |                                                 |                                                |
| listD               | K55K     | Silent           | PA3127        | hypothetical protein                            | Hypothetical, unclassified, unknown            |
| listD               | A168V    | Missense         | PA0021        | conserved hypothetical protein                  | Membrane proteins                              |
| listD               | L10Q     | Missense         | PA5537        | hypothetical protein                            | Hypothetical, unclassified, unknown            |
| listD               | L435L    | Silent           | PA2840        | probable ATP-dependent RNA helicase             | Transcription, RNA processing and degradation  |
| listE               | I65I     | Silent           | PA1192        | conserved hypothetical protein                  | Hypothetical, unclassified, unknown            |
| listI               | L117F    | Missense         | PA2196        | probable transcriptional regulator              | Transcriptional regulators                     |
| listI               | 11717    | Intergenic       | PA1566//      | 15 upstream conserved hypothetical protein/453  | Hypothetical, unclassified, unknown/Hypothetic |
| listI               | N208N    | Silent           | PA1588 sucC   | succinyl-CoA synthetase beta chain              | Energy metabolism                              |
| listI               | D184N    | Missense         | PA1775 cmpX   |                                                 | Membrane proteins                              |
| listJ               | D18G     | Missense         | PA0762 algU   | sigma factor AlgU                               | Transcriptional regulators                     |
| listKA              | R504C    | Missense         | PA4418 ftsI   | penicillin-binding protein 3                    | Cell division; Cell wall / LPS / capsule       |
| listKB              | G344G    | Silent           | PA4900        |                                                 |                                                |
| listKB              | T122T    | Silent           | PA4089        | probable short-chain dehydrogenase              | Putative enzymes                               |
| listKB              | 235      | Silent           | PA1094 fliD   | flagellar capping protein FliD                  |                                                |
| listKB              | V193M    | Missense         | PA2329        |                                                 | Transport of small molecules                   |
| listKB              | V849G    | Missense         | PA3168 gyrA   | DNA gyrase subunit A                            |                                                |
| listKB              | G118S    | Missense         | PA4266 fusA1  | elongation factor G                             |                                                |
| listKB              | G301R    | Missense         | PA4860        | probable permease of ABC transporter            |                                                |
| listKB              | A379V    | Missense         | PA0835 pta    | phosphate acetyltransferase                     | Carbon compound catabolism                     |
| listKB              | H162R    | Missense         | PA4954 motA   | chemotaxis protein MotA                         | Adaptation, Protection; Chemotaxis             |
| listKB              | T213T    | Silent           | PA1818 ldcA   |                                                 | Amino acid biosynthesis and metabolism         |
| listKB              | E182K    | Missense         | PA1810        |                                                 | Transport of small molecules                   |
| listKB              | P230P    | Silent           | PA4811 fdnH   |                                                 | Energy metabolism                              |
| listKB              | R243C    | Missense         | PA4843        | probable two-component response regulator       |                                                |
| listKC              | A8T      | Missense         | PA3951        | conserved hypothetical protein                  | Hypothetical, unclassified, unknown            |
| listKC              | H261L    | Missense         | PA3878 narX   | two-component sensor NarX                       |                                                |
| listKC              | D292A    | Missense         | PA5320 coaC   |                                                 |                                                |
| listKC              | L39L     | Silent           | PA0761 nadB   | L-aspartate oxidase                             |                                                |
| listKC              | L32L     | Silent           | PA1121 yfiR   | YfiR                                            | Cell wall / LPS / capsule                      |
| listKC              | Y196_    | Nonsense         | PALES_4: oprD |                                                 | Transport of small molecules                   |
| listKC              | F190F    | Silent           | PA2069        | probable carbamoyl transferase                  | Putative enzymes                               |
| listKC              | P36L     | Missense         | PA2674        | probable type II secretion system protein       | Protein secretion/export apparatus             |
| listKD              | 124819   | Intergenic       | PA2138//      | 16 downstream probable ATP-dependent DNA lig    | Hypothetical, unclassified, unknown            |
| listKE              | P353L    | Missense         | PA3162 rpsA   | 30S ribosomal protein S1                        |                                                |
| listKE              | 8641     | Intergenic       | PA1563//      | 38 downstream conserved hypothetical protein/4  | Hypothetical, unclassified, unknown/Hypothetic |
| listKF              | R160R    | Silent           | PA2156        | conserved hypothetical protein                  | Hypothetical, unclassified, unknown            |
| listKG              | 4965     | Not annotated    |               |                                                 |                                                |
| listKG              | 20159    | Intergenic       | PA0915//      | 59 upstream conserved hypothetical protein/3 do | Hypothetical, unclassified, unknown/Hypothetic |
| listKH              | T84P     | Missense         | PA4310 pctB   | chemotactic transducer PctB                     | Adaptation, Protection; Chemotaxis             |
| listKH              | 7743     | Intergenic       | PA4610//      | 45 downstream hypothetical protein/17 downstre  | Hypothetical, unclassified, unknown/Hypothetic |
| listKH              | L666L    | Silent           | PA1181        | conserved hypothetical protein                  | Membrane proteins                              |
| listKH              | V255V    | Silent           | PA0687        | probable type II secretion system protein       | Protein secretion/export apparatus             |
| listL               | E572K    | Missense         | PA14_03220    | Hypothetical protein                            | Hypothetical, unclassified, unknown            |
| listL               | R40C     | Missense         | PA4499        | probable transcriptional regulator              | Transcriptional regulators                     |
| listM               | R21P     | Missense         | PA2537        | probable acyltransferase                        | Fatty acid and phospholipid metabolism         |

|        |        |               |              |                                                    |                                                   |
|--------|--------|---------------|--------------|----------------------------------------------------|---------------------------------------------------|
| listM  | G107R  | Missense      | PA1923       | hypothetical protein                               |                                                   |
| listM  | S190S  | Silent        | PA4809       | fdhE FdhE protein                                  | Energy metabolism                                 |
| listM  | T345P  | Missense      | PA3464       | hypothetical protein                               | Hypothetical, unclassified, unknown               |
| listM  | N545K  | Missense      | PA1992       | ercS ErcS                                          | Two-component regulatory systems                  |
| listN  | G641G  | Silent        | PA4021       | probable transcriptional regulator                 | Transcriptional regulators                        |
| listN  | Y258Y  | Silent        | PA0091       | vgrG1 VgrG1                                        | Hypothetical, unclassified, unknown               |
| listO  | A431T  | Missense      | PA5338       | spoT                                               |                                                   |
| listO  | Y59_   | Nonsense      | PA0762       | algU sigma factor AlgU                             | Transcriptional regulators                        |
| listO  | G72G   | Silent        | PA0136       |                                                    | Transport of small molecules                      |
| listPA | P113L  | Missense      | PA2687       | pfeS two-component sensor PfeS                     | Two-component regulatory systems                  |
| listPA | A3021A | Silent        | PA2424       | pvdL PvdL                                          | Adaptation, Protection                            |
| listPA | S173L  | Missense      | PA0762       | algU sigma factor AlgU                             | Transcriptional regulators                        |
| listPA | R40Q   | Missense      | PA3304       | conserved hypothetical protein                     | Hypothetical, unclassified, unknown               |
| listPB | A1060A | Silent        | PA14_36730   | putative trehalose synthase                        | Carbon compound catabolism                        |
| listPB | L49L   | Silent        | PA4815       | hypothetical protein                               | Membrane proteins                                 |
| listPC | L273L  | Silent        | PA2776       | conserved hypothetical protein                     | Hypothetical, unclassified, unknown               |
| listPC | A115A  | Silent        | PA2925       | hisM histidine transport system permease HisM      |                                                   |
| listPD | G345D  | Missense      | PA2597       | hypothetical protein                               | Putative enzymes                                  |
| listPE | G308S  | Missense      | PA0368       | conserved hypothetical protein                     | Hypothetical, unclassified, unknown               |
| listPF | 1786   | Intergenic    | PA4109/ampR/ | 104 upstream transcriptional regulator AmpR/45     | Transcriptional regulators/Adaptation, Protection |
| listPF | A55V   | Missense      | PA0607       | rpe ribulose-phosphate 3-epimerase                 | Energy metabolism                                 |
| listPF | A775A  | Silent        | PA0903       | alaS alanyl-tRNA synthetase                        |                                                   |
| listPF | 29218  | Intergenic    | PA2330//     | 7 upstream hypothetical protein/43 downstream      | Hypothetical, unclassified, unknown/Membrane      |
| listPF | I208I  | Silent        | PA5320       | coaC                                               |                                                   |
| listPG | A289V  | Missense      | PA2998       | nqrB                                               | Energy metabolism                                 |
| listPG | D277N  | Missense      | PA3547       | algL poly(beta-d-mannuronate) lyase precursor AlgL |                                                   |
| listPG | V278M  | Missense      | PA4102       | bfmS BfmS                                          |                                                   |
| listPG | 11767  | Intergenic    | PA1499//     | 256 upstream conserved hypothetical protein/41     | Putative enzymes/Putative enzymes                 |
| listPG | Q185_  | Nonsense      | PA4410       | ddlB D-alanine--D-alanine ligase                   | Cell wall / LPS / capsule                         |
| listPG | G257R  | Missense      | PA4418       | ftsI penicillin-binding protein 3                  | Cell division; Cell wall / LPS / capsule          |
| listPG | G75S   | Missense      | PA3168       | gyrA DNA gyrase subunit A                          |                                                   |
| listPG | 17777  | Intergenic    | PA3168/gyrA/ | 228 upstream DNA gyrase subunit A/9 downstream /   |                                                   |
| listPG | K95N   | Missense      | PA4248       | rplF 50S ribosomal protein L6                      |                                                   |
| listPG | D467G  | Missense      | PA4266       | fusA1 elongation factor G                          |                                                   |
| listPG | G132G  | Silent        | PA5103       | hypothetical protein                               | Hypothetical, unclassified, unknown               |
| listPG | F779S  | Missense      | PA0004       | gyrB DNA gyrase subunit B                          |                                                   |
| listPG | 85377  | Not annotated |              |                                                    |                                                   |
| listPG | H104Y  | Missense      | PA1167       | hypothetical protein                               | Hypothetical, unclassified, unknown               |
| listPG | Q402_  | Nonsense      | PA0411       | pilJ twitching motility protein PilJ               | Chemotaxis; Motility & Attachment                 |
| listPG | P221P  | Silent        | PA1459       | probable methyltransferase                         | Chemotaxis                                        |
| listPG | N141D  | Missense      | PA1775       | cmpX                                               | Membrane proteins                                 |
| listPG | T1282I | Missense      | PA2424       | pvdL PvdL                                          | Adaptation, Protection                            |
| listPG | S59L   | Missense      | PA2426       | pvdS sigma factor PvdS                             | Transcriptional regulators                        |
| listPG | S280L  | Missense      | PA3267       | hypothetical protein                               | Membrane proteins                                 |
| listPG | P71L   | Missense      | PA3385       | amrZ alginate and motility regulator Z             |                                                   |
| listPG | P358P  | Silent        | PA3339       | PlpD patatin-like protein, PlpD                    |                                                   |
| listPG | A28A   | Silent        | PA5039       | aroK shikimate kinase                              | Amino acid biosynthesis and metabolism            |
| listPG | P149L  | Missense      | PA5034       | hemE uroporphyrinogen decarboxylase                |                                                   |
| listPG | G543E  | Missense      | PA3141       | wbpM nucleotide sugar epimerase/dehydratase WbpM   |                                                   |
| listPG | 4892   | Not annotated |              |                                                    |                                                   |
| listPG | R61H   | Missense      | PA0337       | ptsP                                               | Transport of small molecules                      |
| listPG | A72T   | Missense      | PA0204       | probable permease of ABC transporter               |                                                   |
| listPG | A419A  | Silent        | PA2652       | probable chemotaxis transducer                     | Adaptation, Protection; Chemotaxis                |
| listPG | V135M  | Missense      | PA2620       | clpA ATP-binding protease component ClpA           |                                                   |
| listPG | R84H   | Missense      | PA2837       | probable outer membrane protein precursor          | Transport of small molecules                      |
| listPG | E267K  | Missense      | PA5241       | ppx exopolyphosphatase                             |                                                   |
| listPG | R19R   | Silent        | PA4785       | probable acyl-CoA thiolase                         | Putative enzymes                                  |
| listPG | P330P  | Silent        | PA1255       | hypothetical protein                               | Hypothetical, unclassified, unknown               |
| listPH | T296T  | Silent        | PA5013       | ilvE branched-chain amino acid transferase         | Amino acid biosynthesis and metabolism            |
| listPH | S466A  | Missense      | PA0004       | gyrB DNA gyrase subunit B                          |                                                   |
| listPH | L345L  | Silent        | PA2059       | probable permease of ABC transporter               |                                                   |
| listPI | D18G   | Missense      | PA0762       | algU sigma factor AlgU                             | Transcriptional regulators                        |
| listQ  | 25053  | Not annotated |              |                                                    |                                                   |
| listR  | E258Q  | Missense      | PA4670       | prs ribose-phosphate pyrophosphokinase             |                                                   |
| listS  | M332I  | Missense      | PA5035       | gltD glutamate synthase small chain                | Amino acid biosynthesis and metabolism            |

|        |       |            |               |                                                |                                                 |
|--------|-------|------------|---------------|------------------------------------------------|-------------------------------------------------|
| listXB | A112T | Missense   | PA5133        | conserved hypothetical protein                 | Membrane proteins                               |
| listXB | 22058 | Intergenic | PA1578//      | 10 downstream hypothetical protein/482 upstrea | Hypothetical, unclassified, unknown/Hypothetic  |
| listXB | V163G | Missense   | PA1833        | probable oxidoreductase                        | Putative enzymes                                |
| listXB | S36_  | Nonsense   | PA4661 pagL   | Lipid A 3-O-deacylase                          | Hypothetical, unclassified, unknown             |
| listXB | H269Q | Missense   | PA4666 hemA   | glutamyl-tRNA reductase                        |                                                 |
| listXB | D106N | Missense   | PA0705 migA   | alpha-1,6-rhamnosyltransferase MigA            | Putative enzymes; Cell wall / LPS / capsule     |
| listXB | 72043 | Intergenic | PA2894//      | 40 upstream hypothetical protein/306 downstrea | Hypothetical, unclassified, unknown/Hypothetic  |
| listXC | H215Y | Missense   | PA4110 ampC   | beta-lactamase precursor                       | Adaptation, Protection                          |
| listXC | P534S | Missense   | PA3545 algG   | alginate-c5-mannuronan-epimerase AlgG          |                                                 |
| listXC | H353H | Silent     | PA1331        | conserved hypothetical protein                 | Hypothetical, unclassified, unknown             |
| listXC | Q37Q  | Silent     | PA3103 xcpR   | general secretion pathway protein E            | Protein secretion/export apparatus              |
| listXC | A461V | Missense   | PA4228 pchD   | pyochelin biosynthesis protein PchD            |                                                 |
| listXC | 19417 | Intergenic | PA4709//phuR  | 128 upstream probable hemin degrading factor/5 | Putative enzymes/Transport of small molecules   |
| listXC | 11844 | Intergenic | PA5136//      | 12 downstream hypothetical protein/25 downstre | Hypothetical, unclassified, unknown/Hypothetic  |
| listXC | V452V | Silent     | PA5554 atpD   | ATP synthase beta chain                        | Energy metabolism                               |
| listXC | R25H  | Missense   | PA2109        | hypothetical protein                           | Hypothetical, unclassified, unknown             |
| listXC | R808H | Missense   | PA3297        | probable ATP-dependent helicase                | Transcription, RNA processing and degradation   |
| listXC | G94D  | Missense   | PA3432        | hypothetical protein                           | Membrane proteins                               |
| listXC | I16I  | Silent     | PA4827        | arylamine N-acetyltransferase                  | Adaptation, Protection; Putative enzymes        |
| listXC | T250M | Missense   | PA3593        | probable acyl-CoA dehydrogenase                | Putative enzymes                                |
| listZZ | A71A  | Silent     | PA1095        | hypothetical protein                           | Hypothetical, unclassified, unknown             |
| listZZ | P31P  | Silent     | PA14_58740    | hypothetical protein                           | Hypothetical, unclassified, unknown             |
| listZZ | I61I  | Silent     | PA2185 katN   | non-heme catalase KatN                         | Adaptation, Protection                          |
| listZZ | T74I  | Missense   | PA1583 sdhA   | succinate dehydrogenase (A subunit)            | Energy metabolism                               |
| listZZ | S372S | Silent     | PA0172        | hypothetical protein                           | Hypothetical, unclassified, unknown             |
| listZW | A182A | Silent     | PA3541 alg8   | alginate biosynthesis protein Alg8             |                                                 |
| listZW | Q10_  | Nonsense   | PA0789        | probable amino acid permease                   |                                                 |
| listZW | H102Q | Missense   | PA4726 cbrB   | two-component response regulator CbrB          |                                                 |
| listZW | V79V  | Silent     | PA0749        | hypothetical protein                           | Hypothetical, unclassified, unknown             |
| listZW | A192V | Missense   | PA3232        | probable nuclease                              | Putative enzymes                                |
| listZW | T149P | Missense   | PA1696 pscO   | translocation protein in type III secretion    | Protein secretion/export apparatus              |
| listZW | L42L  | Silent     | PA0337 ptsP   |                                                | Transport of small molecules                    |
| listZW | 56672 | Intergenic | PA2634//aceA/ | 178 downstream isocitrate lyase AceA/1 upstrea | Putative enzymes/Hypothetical, unclassified, un |
| listZW | 72043 | Intergenic | PA2894//      | 40 upstream hypothetical protein/306 downstrea | Hypothetical, unclassified, unknown/Hypothetic  |

<sup>a</sup>Branch names are denoted in the phylogenetic tree in Figure 2.
