# Supplementary material for: Environmental Heterogeneity Drives Within-Host Diversification and Evolution of Pseudomonas aeruginosa
Source: PubMed Central journal article supplement — mBio. 2014 Sep 16;5(5):e01592-14. doi: 10.1128/mBio.01592-14 (PMC4172072; doi:10.1128/mbio.01592-14), 2014-09-16
Supplement: mbo005141988st2.pdf [file mbo005141988st2.pdf]

**Table S2.** Primers used for multiplex PCR.

| <b>Primers</b> | <b>Cluster</b>   | <b>Oligonucleotide sequence (5'-3')</b> | <b>Amplicon size (bp)</b> |
|----------------|------------------|-----------------------------------------|---------------------------|
| gyrB_fw        | Cluster A        | CTCTCCGCCAGGAGGTC                       | 466                       |
| gyrB_rev       |                  | CCGACACGGTAGGCAGGTAG                    |                           |
| narx_fw        | Cluster B        | TCTCGCAGAGCCTCCAGC                      | 76                        |
| narX_rev       |                  | CGGCTGTCGTAGGGTTCT                      |                           |
| bfmS_fw        | Cluster C        | ACCTGGTCCGCGAAGGCA                      | 100                       |
| bfmS_rev       |                  | AAGACCAGGCTGTCGAGGAA                    |                           |
| mucA_fw        | Internal control | GAGTCGTGAAGCCCTGCA                      | 333                       |
| mucA_rev       |                  | AGGGCGTCGTTCTGGTTGTA                    |                           |
